# Supplementary material for: Discovery of Intermediary Genes between Pathways Using Sparse Regression
Source: PLoS One. 2015 Sep 8;10(9):e0137222. doi: 10.1371/journal.pone.0137222 (PMC4562633; doi:10.1371/journal.pone.0137222)
Supplement: S1 File — Complete gene lists of Γ W∩T\M, Γ W∩M\T, Θ W∩T\M, Θ W∩M\T, Φ W∩T\M, and Φ W∩M\T (Table A). Top GO terms for shared neighbor genes between TLR-signaling pathway and antigen processing and presentation genes (Table B). Top GO terms for shared neighbor genes betwen TLR-signaling pathway and apoptosis genes (Table C). Top GO terms for shared neighbor genes between TLR-signaling pathway and Jak-Stat pathway genes (Table D). (XLSX) [file pone.0137222.s001.xlsx]

## Sheet: A - Gene lists
TLR-signaling Pathway : Antigen Processing and Presentation												TLR-signaling Pathway : Apoptosis												TLR-signaling Pathway : Jak-Stat Pathway
Gamma_WM\T		Gamma_WT\M		Theta_WM\T		Theta_WT\M		Omega_WM\T		Omega_WT\M		Gamma_WM\T		Gamma_WT\M		Theta_WM\T		Theta_WT\M		Omega_WM\T		Omega_WT\M		Gamma_WM\T		Gamma_WT\M		Theta_WM\T		Theta_WT\M		Omega_WM\T		Omega_WT\M
Pyhin1		Vcp		1600020E01Rik		0610009O20Rik		Sgk3		Rrs1		Cmtr1		Psmb7		1300002E11Rik		1100001G20Rik		F11r		Zdhhc5		Ifi205		Psmb7		1110038F14Rik		0610009O20Rik		Sgk3		Rrs1
Ifi205		Oasl2		1700017B05Rik		1100001G20Rik		F11r		Mink1		Timeless		Hsd17b12		1600020E01Rik		1110004E09Rik		Anxa7		Il27		Ascc3		Nfe2l1		1300002E11Rik		1100001G20Rik		F11r		1700034P13Rik
Slfn4		Oas1a		1700034P13Rik		1110008P14Rik		Anxa7		Ywhae		Tmem67		Pdpn		1700034P13Rik		1110008P14Rik		Tmx4		Il1r2		Slfn4		Rab10		1700017B05Rik		1110004E09Rik		Acox1		Lrrc59
Phf11a		Nfe2l1		1700113A16Rik		1110058L19Rik		Tmx4		Lrrc59		Vdac3		Met		1810032O08Rik,Snord1a		1110038B12Rik		Perm1		Cndp2		Phf11a		Il1rap		1810032O08Rik,Snord1a		1110008P14Rik		Anxa7		Psma6
H2-T22,H2-T9		Il1rap		2310009B15Rik		1700063D05Rik		Perm1		Pdk2		Ptpro		Agpat2		2310009B15Rik		1190002F15Rik		Camkk2		Hmox1		Cmtr1		Synj2		2310009B15Rik		1110012L19Rik		Tmx4		Sptlc2
Pla2g16		Jak2		3110062M04Rik		1810009A15Rik,LOC102308570		Ddx26b		Sptlc2		Ppa1		Cct3		2310061I04Rik		1190007I07Rik		Srpr		Agfg1		Gbp2		Hsd17b12		2310061I04Rik		1110032A03Rik		Perm1		Psmd6
AW112010		Pdpn		5031425E22Rik		1810013L24Rik		Il1r2		Smarca2		Ppp2r2a		Cog8		3110056K07Rik		1300002K09Rik		Dst		Serpinb2		Cept1		Ap2a2		2700029M09Rik		1110046J04Rik		Cdca8		Map4k2
Sppl2a		1110038F14Rik		5430405H02Rik		1810022K09Rik		Sp100		Zdhhc5		Fzd5		Myo18a		3110062M04Rik		1600002K03Rik		Sp100		Ppp1r15b		Mthfr		Pank2		3110062M04Rik		1190007I07Rik		Fam126a		Smarca2
Mthfr		Eme2		5730508B09Rik		1810055G02Rik		Pyhin1		Vcp		Wsb1		Fbxo30		3110070M22Rik		1700007J10Rik		Pyhin1		Arl8a		AW011738		H2afy		3110070M22Rik		1700021K19Rik		Camkk2		Fam98b
AW011738		Slc16a10		6030408B16Rik		2200002D01Rik		Coa5		Dtx2		Trim13		Ndel1		4921524J17Rik		1700021K19Rik		Coa5		Ptgs2		Herc6		Elovl5		4921524J17Rik		1810022K09Rik		Srpr		Zdhhc5
Dck		Adora2b		6330416G13Rik		2310039L15Rik		Sp110		N4bp2l1		Zfp488		Maff		5430405H02Rik		1810026B05Rik,Chd2		Sp110		Tnfsf4		Arl6ip1		9430016H08Rik		5031425E22Rik		1810055G02Rik		Dst		1810022K09Rik
Herc6		Cdk5r1		A230046K03Rik		2510003E04Rik		Cacybp		Cnep1r1		Arl5b		Top1		5730508B09Rik		1810055G02Rik		Cacybp		Cd247		Ddx60		Rap1b		5430405H02Rik		2200002D01Rik		Sp100		Vcp
Tmco3		Eif2b2		A230050P20Rik		2510009E07Rik		Ifi204		Mon1b,Syce1l		Rbbp6		Rab20		6030408B16Rik		2200002D01Rik		Ifi204		Ino80d		Mlkl		Ppp2r2a		5730508B09Rik		2210408F21Rik		Pyhin1		Dtx2
Mlkl		Cdc42ep2		A630089N07Rik		2700062C07Rik		Mnda		Psmd7		Serpinb6b		Rrs1		9930111J21Rik1,9930111J21Rik2,Psme2b		2210408F21Rik		Mnda		Epha4		Srgap2		Il1f6		6030408B16Rik		2310039L15Rik		Coa5		Cbx3
Uba7		Top1		A730017L22Rik		2810408M09Rik		Ifi202b		C2cd2l		Spata13		Ptpre		A230050P20Rik		2310011J03Rik		Ifi202b		Cul3		Timeless		Plagl2		6330416G13Rik		2610034B18Rik		Sp110		Cnep1r1
Timeless		Xcr1		Actb		3110056K07Rik		Ifi205		Map4k4		Mir7678,Slpi		Abhd17c		A530032D15Rik		2410004N09Rik		Ifi205		Nppc		Adap2		Eif2s2		A230050P20Rik		2610507I01Rik		Cacybp		Mon1b,Syce1l
Tmem67		Nppc		Agrn		4930549G23Rik		Ascc3		Eme2		Cebpa		Bcl2a1b		Abca1		2510009E07Rik		Ascc3		Vps4b		Glipr2		Ythdf1		A330023F24Rik,Mir29b-2,Mir29c		2700062C07Rik		Ifi204		Psmd7
Kdr		Icosl		Agtrap		9430016H08Rik		Ppa1		Hmox1		4933426M11Rik		Ptpn23		Actb		2610034B18Rik		Ppa1		Ralb		Ptgr2		Pdcd10		A630089N07Rik		2810408M09Rik		Mnda		Mmp13
1600014C10Rik		Stx11		AI506816		A4galt		4933412E12Rik		Agfg1		Arl1		6530402F18Rik,Ntng2		Adam8		2700062C07Rik		Timeless		Nploc4		Hdc		Denr		A730017L22Rik		3110040N11Rik		Ifi202b		C2cd2l
Trim12c		Optn		AI607873		A630033H20Rik		Timeless		Psmd1		Slc11a2		Ptgs2		Agrn		2810004N23Rik		Dbnl		Dapk1		Rasa3		St7		Actb		3110082I17Rik		Ifi205		Eme2
Vasp		Eif4e		AI837181		Abca2		Dbnl		Serpinb2		Tnfsf4		Wdr92		Agtrap		2810408M09Rik		Xaf1		Gmnn		Sde2		Acot9		Agrn		4930455C13Rik		Ascc3		Psmd5
Vdac3		Gpr85		Apobec1		Abhd4		Hist3h2a		Ptgs2		Cggbp1		Plek		AI413582		4930455C13Rik		Nos2		Mettl6		Phlda1		Fzd5		Agtrap		4930549G23Rik		Ppa1		9430016H08Rik
Ccnd1,Mir3962		Akap13		Apool		Abtb1		Xaf1		Tnfsf4		Zeb2os		Irf2bp2		AI607873		5830432E09Rik		Rnf135		Eif6		Wsb1		Fbxo30		AI607873		5430417L22Rik		4933412E12Rik		Bzw1
Rab21		Abhd17c		Arel1		Acbd3		Nos2		Cd247		Zfp131		Apol7c		AI837181		6430706D22Rik,A730008H23Rik,Hjurp		Slfn1		Pstpip1		Mesdc2		Zbtb2		AI837181		5830432E09Rik		Timeless		Agfg1
Mesdc2		Bcl2a1b		Arf5		Acp5		Rnf135		Acbd3		Gtf2b		Dusp16		Aim1		9030619P08Rik		Slfn4		Zc3h11a		Pdlim5		Rel		Arel1		9030619P08Rik		Dbnl		Psmd1
Mmp25		Ptpn23		Arhgef40		Acsl3,Utp14b		Slfn1		Gm13363,Ptp4a1		Ereg		Pirb		Ak1		9430008C03Rik		Tmem106a		Rnf2		Edn1		Ndel1		Arhgap25		9130401M01Rik		Xaf1		Sh3bp4
Orc5		Serpinb2		Ascc3		Acss1		Slfn4		Rnf149		Nrg1		Cdc42bpg		Ap5z1		9430015G10Rik		Lgals9		Rgl1		Ddx24		Hbp1		Arhgef40		9430008C03Rik		Nos2		Tmem185b
Jarid2		Ptgs2		Atf3		Actl6a		Cnp		Mreg		Zfyve19		Ralgds		Apool		9430016H08Rik		Dhx58		Hnrnpu		Slc11a2		Cd83		Ascc3		9430015G10Rik		Rnf135		Ppp1r15b
Gm20362		Plek		Atp10d		Acvr1b		Tmem106a		Nppc		Ints10		Cxcl1		Arel1		A430107P09Rik		Asb13		Reps1		Ptgs2		Plk2		Atf3		9430016H08Rik		Slfn4		Zfp281
Tmem180		Golph3		AW011738		Acyp1		Fmnl1		Nploc4		Gpr84		Rab11fip1		Arf5		A630033H20Rik		Lgals8		Hbs1l		Marcksl1		1810013L24Rik		Atf7		9430038I01Rik		Tmem106a		Tnfsf4
Ssx2ip		Iffo1		B3galt2		Adamts10		Milr1		Dapk1		Dolk		Ciapin1		Arhgef40		AA414768		H2afy		Cd24a		Pik3ip1		Ets2		Atxn7l1		A630033H20Rik		Fmnl1		Cd247
Cxcl16		Bcl2a1c		Bloc1s6		Adck2		Lgals9		Gmnn		Samhd1		2510009E07Rik		Arl11		Abca2		Zcchc6		Ptbp1		Rab8b		Chd1		Aven		Abca3		Lgals9		Acbd3
Glrx		Slamf6		Bst2		Adra2a		Dhx58		Mettl6		Iigp1		Eid3		Ascc3		Abcc3		Psme2		Snf8		Ccnk		Trem1		B3gnt8		Abcd4		Dhx58		Gm13363,Ptp4a1
Lcn2		Esd		C1galt1c1		Aff4		Rab5c		Gnb1		Gnb4		Vasn		Asf1a		Abcc4		Phf11a		Trmt61b		Ptpn2		Tnf		Baz1b		Abhd4		Lgals8		Raph1
Ifitm3		Pirb		Cant1		Ago1		Asb13		Pstpip1		Sp110		Usp16		Atf3		Abhd4		Phf11b		Psmb7		Arfip2		Bcl2l11		BC051226		Abtb1		Zcchc6		Mreg
Shisa5		Mtmr12		Car2		Agpat3		Ninj1		Zc3h11a		Parp8		Cxcl2		AW112010		Acbd3		Gsdmd		Psmc4		Gdf15		Rbm39		Bloc1s6		Acad11		Epsti1		Epha4
Mapk6		Etf1		Casp7		Ahr		Lgals8		Hbs1l		Tap2		Tfec		B2m		Acbd6		Cmtr1		Ube2n		Zdhhc7		Adora2b		Bst2		Aco1		Psme2		Cul3
Orai2		Smg8		Cc2d1a		Ak4		Serpinb1a		Cdk19		I830012O16Rik		Rbm7		B3gnt8		Acp5		Tap1		Ptges3		Nrg1		Cdk5r1		C1galt1c1		Acvr1b		Phf11a		Nppc
Mrpl32		Samsn1		Ccdc124		Akip1		H2afy		Icosl		Gm14446		Rffl		B4galt5		Acsl3,Utp14b		Psmb8		Cs		Gas7		Eif2b2		Cab39l		Adam15		Phf11b		St8sia4
Sh3glb1		Cdc42bpg		Ccdc163		Akna		Zcchc6		Ptbp1		Il15ra		Plat		BC051226		Acss1		Tap2		Abracl		Dcaf13		Tmem251		Cant1		Adamts10		Gsdmd		Ralb
Fam26f		Cxcl1		Ccnd1,Mir3962		Alcam		Epsti1		Slc15a3		Nmi		Nfat5		BC100530		Actl6a		Gm6034		Rap1b		Mtmr14		Top1		Capn2		Adamtsl4		Cd47		Nploc4
Atp10a		Rab11fip1		Cd180		Alg11		Cebpe		Ica1		Rrbp1		Mt1		Bcap31		Acvr1b		Treml2		Ppp2ca		Tjap1		Dcun1d3		Car2		Adck4		Cdip1		Dapk1
Casp4		Gm16702		Cd274		Alg14		Phf11a		Igf1r		Gbp3		Ppp1r15b		Bloc1s6		Adamts13		Bak1		Gas7		Sf3b1		Rab20		Ccdc117		Adck5		Cmtr1		Gmnn
Grn		Gdf15		Cd300lf		Alg2		Phf11b		Psmc4		Mov10		Mtmr14		Bst2		Adamtsl4		D17Wsu92e		Myo18a		Nfkbiz		Icosl		Ccdc130		Adipor2		Tap1		Mettl6
Ly6e		Baz1a		Cd38		Alkbh1,Nrp		Gsdmd		Pwp1		Tpst1		Sdc1		C130026I21Rik		Adck4		H2-K2		Slc9a3r1		Kif3b		Tnip1		Ccnd1,Mir3962		Adpgk		Psmb8		Card9
Ly6c2		Stip1		Cd47		Ankrd27		Apobec3		Ube2n		Gbp6		Emr1		C1galt1c1		Adm		Psmb9		Supt6		Arih2		Eif4e		Cd180		Adsl		Tap2		Eif6
Cfb		Rpl5		Cdadc1		Ankrd28		Slc38a1		Ptges3		Tuba8		Fam219b		Cab39l		Ago1		H2-T10		Hnrnpk		Fam26f		Lrrc8d		Cd1d1		Afg3l1		Gm6034		Gnb1
Siglec1		Fam111a		Cdip1		Ankrd44		Hmox2		Zbtb2		Ly9		Creb5		Cant1		Agpat3		Enpp4		Appl1		Carhsp1		Ptpre		Cd274		Ago1		Treml2		Pstpip1
Bst1		Sdccag3		Cdkn2c		Ano8		Rtp4		Abracl		Ifi204		Samsn1		Capn15		Aif1		Gm4951		Timm23		Ch25h		Relb		Cd300lf		AI462493		Bak1		Tmem183a
Anapc5		Zfp408		Cebpe		Anxa6		Cd47		Rap1b		Dhx58		P4ha1		Car2		Akna		Pla2g16		Kpna3		Trp53i11		Icam1		Cd38		Ak4		D17Wsu92e		Hnrnpu
Pira6		Fyb		Cenpb		Ap5s1		Cmtr1		Ppp2ca		Phf11c		Cks2		Ccdc23		Alcam		Ifit2		Ppp2r2a		Ifih1		6530402F18Rik,Ntng2		Cd47		Alcam		H2-K2		Ahctf1
Stk40		Fbxl5		Chchd6		Apbb1ip		Gm6034		Gas7		Enpp4		Psd		Ccnd1,Mir3962		Alg11		Ifit3		Ywhaz		Atp10a		Prkag2		Cdip1		Aldh4a1		Psmb9		Reps1
Hmg20a		Oas3		Clu		Apbb2		Treml2		Myo18a		Ifit2		Gabpb1		Cd180		Alg2		I830012O16Rik		Apol7c		Hif1a		Zfp319		Cdk20		Alg11		H2-T10		Hbs1l
D17Wsu92e		Psmb4		Cox18		Aph1b		Bak1		Slc9a3r1		Gbp9		Bcl10		Cd274		Alkbh1,Nrp		AW112010		Dnal4		Dtx4		Serpinb2		Cdkn2c		Alg2		Enpp4		Arhgap18
Ifi35		Ncln		Cox5b		Apoo,Apoo-ps		D17Wsu92e		Hnrnpk		Rilpl1		Siah2		Cd38		Angptl2		Tbc1d13		Ptplb		Herc3		1700021K19Rik		Cdt1		Alkbh1,Nrp		Gm4951		Cdk19
Rsad2		Erbb2ip		Ctsc		Araf		H2-K2		Timm23		Parp11		Osgin2		Cd47		Ankrd28		Dync1i2		Dcbld2		Tifa		Rbbp8		Cebpe		Angptl2		Pla2g16		Adora2a
Iigp1		Mapk8		Cutc		Arap2		H2-T22,H2-T9		Ywhaz		Mnda		4933416M07Rik		Cd72		Ankrd52,Mir6914		Ube2l6		Cct8		Mxd1		Mad2l1		Cept1		Ankrd49		Ifit2		Icosl
Ifit1		Spopl		D17Wsu92e		Arc		Enpp4		Apol7c		Gm4951		Ssh2		Cdc42ep4		Ankrd66		Hck		Pygb		Ifi35		Irf2bp2		Chpt1		Anks1		Ifit3		Ptbp1
Aida		Acvr1		D1Ertd622e		Areg		Gm4951		Ptplb		Pmepa1		Metap1		Cdip1		Ano10		1110008F13Rik		Aar2		Aftph		Vps4b		Cipc		Ano10		I830012O16Rik		Ap2b1
Sp110		Hebp1		Dcakd		Arg2		Pla2g16		Dcbld2		Gbp7		Ctu1		Cdk20		Ap5s1		Rmdn3		Slc2a6		Cmpk2		Hsp90aa1		Clu		Anxa6		Casp7		Slc15a3
Mndal		Plekhg1		Dck		Arl2bp		Ifit2		Cct8		Nlrc5		Fbxw11		Cdt1		Apbb1ip		Samhd1		Stam2		Rsad2		Mterfd1		Coa4		Ap3s2		AW112010		Tm9sf4
Pttg1		Cdk5rap3		Ddx20		Arl8b		Ifit3		Il1f6		Cdk5rap3		Opa3		Cebpe		Apbb2		Zbp1		Cd44		Max		Apol7c		Cox18		Ap5s1		Tbc1d13		Psmb7
Snrpc		4632428N05Rik		Ddx58		Arntl		I830012O16Rik		Pygb		Car13		Wdr8		Cept1		Aph1b		Ube2q1		Pdcd10		Iigp1		Smndc1		Ctbs		Apbb1ip		Dync1i2		Igf1r
I830012O16Rik				Dennd1b		Asah1		Casp7		Mapre1				Ube4a		Chpt1		Apoo,Apoo-ps		Psma5		Tmem55a		Ifit1		Mul1		Cutc		Apbb2		Ube2l6		Psmc4
Gm14446				Dennd3		Asnsd1		AW112010		Aar2				Thoc6		Cipc		Araf		Gbp2		Denr		Aida		H2-Q4		Cyb5		Apoo,Apoo-ps		Sec23b		Aph1c
Il15ra				Dram1		Atat1		Tbc1d13		Dlgap4						Clu		Arap2		Mov10		Fzd1		Sp110		Procr		Cyb561d2		Araf		Hck		Eid3
Chmp4b				Dtx3l		Atg2a		Dync1i2		Surf4						Cmklr1		Arl2bp		Cept1		Pom121		Mndal		Mreg		D17Wsu92e		Arfip2		1110008F13Rik		Pwp1
Nmi				Dusp22		Atp1a1		Itga4		Ncoa5						Cmpk2		Arl8b		5730508B09Rik		Ppp4r2		Parp8		Mtmr12		D1Ertd622e		Arhgap4		Rmdn3		Ube2n
Rrbp1				E130102H24Rik,Mir101a		Atp6v1e1		Ube2l6		Pdcd10						Coa4		Armc7		Ifi44l		Dnaja2		Tap2		Etf1		Dcakd		Arhgap9		Samhd1		Eea1
Tnfsf10				Eva1b		Atp8b2		Sec23b		Denr						Cox18		Arrdc2		Aldh1b1		Bcl2a1d		I830012O16Rik		Pip5k1a		Dck		Arl10		Zbp1		Ptges3
Mov10				F11r		Atrx		Hck		Kctd10						Creg1		Arrdc4		Tdrd7		Acot9		Gm14446		Rasd1		Ddx20		Arl14ep		Ube2q1		Cs
Isg15				Fam114a1		B230118H07Rik		1110008F13Rik		Pom121						Ctbs		Atat1		Ccdc23		Stx11		Chmp4b		Smg8		Degs2		Arl8b		Psma5		Abracl
Tpst1				Fam53c		B4galt6		Rmdn3		Usp12						Ctso		Atf4		Tmco4		Vta1		Nmi		Ier5		Dennd1b		Armc7		Gbp2		Smpd2
Gbp6				Fbxl14		Bag5		Zbp1		St7						Ctss		Atl2		Mthfr		2810442I21Rik		Tnfsf10		Dusp6		Dennd3		Arrb2		Slc27a3		Rap1b
Mvp				Fbxw17		Baiap2		Ube2q1		Elavl1						Cutc		Atp10d		AW011738		Dnajb9		Gbp3		Zfp825		Dgkz		Arrdc2		Mov10		Zfp692
Lgals3bp				Fez2		BC003965		Psma5		Dnaja2						Cyp2ab1		Atp13a3		Ddx58		Ints6		Mov10		Zfp622		Dram1		Asnsd1		5730508B09Rik		Myo18a
Npc2				Flrt2		BC048403		Gbp2		Uba5						D17Wsu92e		Atp1a1		Dck		Prn,Prnd,Prnp		Hdac1		Gm16702		Dtnb		Atf5		Ifi44l		Taf15
Ift22				Fnbp4		Bckdhb		Slc27a3		Morf4l2						D1Ertd622e		Atp5g2		Oasl2		Mir3095		Isg15		Ttc13		Dusp22		Atp13a2		Aldh1b1		Mllt6
Znhit1				Foxo4		Bcl2l11		Mov10		Dse						Dach1		Atp6v1e1		Gbp9		Zswim4		Gbp6		Btg1		Dxo		Atp13a3		Tdrd7		Rnd2
Il18bp				Frmd4a		Bcl7c		Cept1		Marcks						Dcakd		B230118H07Rik		Suds3		Marcks		Tuba8		Dusp14		Egr2		Atp6v1e1		Ccdc23		Slc9a3r1
Aph1c				Gca		Bet1		5730508B09Rik		Cry1						Dck		B4galt6		Oas1a		Prdm4		Ncln		Frmd6		Ergic1		B230118H07Rik		Tmco4		Strada
Sp100				Gimap1		Bnip1		Ifi44		Wdr92						Ddx58		Bag5		Rilpl1		Wdr92		Ly9		Vasn		Ets1		B4galt6		Mthfr		Rhbdf2
Ifi204				Gm10865		Bod1		Ifi44l		Cpeb4						Degs2		Baiap2		Rfc3		Cpeb4		Dirc2		E2f8		F11r		Baiap2		AW011738		Exoc3l4
Aim1				Gm4951		Bpgm		Aldh1b1		Pmp22						Dennd1b		Basp1		Herc6		Ubtd2		Acp6		Mki67		Fbxo32		Basp1		Tmem67		Ubxn2a
Dhx58				Gm5431		Brix1		Tdrd7		Csf3						Dennd3		BC003965		Parp12		Fbxw11		Coa5		Mum1		Fbxw4		Batf		Ddx58		Zbed3
Lgals8				Gm8979		Btbd10		Ccdc23		Plek						Depdc7		BC033916		Nod1		G3bp1		Ifi204		Cep250		Fcer1g		BC017158,Mir3103		Dck		Wdr37
Phf11b				Gnb4		C920025E04Rik		Tmco4		Smg8						Dgkz		BC035044		Tapbpl		Pmp22		Aim1		Cd151		Fez2		Bccip		Oasl2		Hnrnpk
Enpp4				Gnl1		Cacfd1		Mthfr		Rdh12						Dram1		Bcl9l		Isg20		Plek		Phf11c		Prr12		Fkbp5		Bcl7c		Gbp9		Timm23
Ifit2				Gnptg		Cbx4		AW011738		Erbb2ip						Dtnb		Bet1		Ctsc		Mtmr12		Enpp4		Inpp5d		Flrt2		Bcl9l		Suds3		Ppp2r2a
Psma5				Gpn3		Cby1		Ddx58		Mtmr12						Dtx3l		Bhlhe40		Trim34a		Ezr		Parp11		Ppp1r15b		Fmnl2		Bet1		Oas1a		Ywhaz
Gbp9				Grasp		Ccdc134		E130102H24Rik,Mir101a		Golph3						Ecm1		Bod1		Trim12c		Etf1		Trim30b		Mllt6		Fnbp1l,Mir7657		Bnip1		Rilpl1		Apol7c
Parp11				Gsap		Ccdc32		Dck		Samsn1						Edem2		Bpnt1		Trim30b		Zc3h15		Mgat1		Exoc3l4		Fnbp4		Bod1		Rfc3		Dnal4
Trim30b				Gtf2h2		Ccnd3		Oasl2		Ezr						Ergic1		Brd1		Trim30a		Nmd3		Slc25a22		St3gal1		Frmd4a		Bpnt1		Herc6		Ptplb
Casp1				H2-D1,H2-L		Ccrn4l		Gbp9		Etf1						F11r		Bricd5		Arl6ip1		Fam133b		Mitd1		Ube2d2a		Gbe1		Bricd5		Parp12		Dcbld2
Slc25a22				H2-T22,H2-T9		Cd84		Suds3		Zc3h15						Fbxl14		Brix1		Tmco3		Lrrc8d		Stard3		Stip1		Gemin7		Brix1		Nod1		Gspt1
Mitd1				Hist1h4c		Cdc42se2		Oas1a		Gmeb2						Fbxo9		Bsdc1		Psmb10		Rybp		Gm4951		Surf4		Gimap1		Btbd10		Tapbpl		Ppp1r2
Mnda				Hist3h2a		Cdk17		Rfc3		Nmd3						Fez2		Btbd10		Casp1		4933416M07Rik		Tbc1d13		Usp12		Gm10865		Btbd2		Isg20		Pak2
Ppp2r5a				Hmgn3		Cds2		Herc6		Snip1						Fgd3		Btf3		Pcsk7		Mapk6		Pmepa1		Tpbg		Gm13546		Bzw2		Ctsc		Cct8
Stard3				Hmox2		Cebpd		Parp12		Cxcl1						Fig4		Btg2		Psma4		Myo1g		Gbp7		Limd1		Gm4951		C130050O18Rik		Trim34a		Rps6ka2
Gm4951				Hn1		Cebpz		Tapbpl		Lrrc8d						Fkbp3		Btg3		Elovl5		Eif4a1		Tdrd7		Uba5		Gm8979		C1d		Trim12c		Rab31
Tbc1d13				Hp1bp3		Chaf1b		1600014C10Rik		Sbds						Flrt2		C1d		Sh3bgrl2		Odc1		Ddx58		Morf4l2		Gnl1		C1qtnf6		Trim30b		Rab12
Gbp7				Hsh2d		Chpf2,Mir671		Isg20		Gpr85						Fnbp1l,Mir7657		C1qtnf6		Keap1		Dld		Trafd1		Slfn2		Gns		C1s1		Trim30a		Adra2a
Ddx58				Htatip2		Ciart		Ctsc		Rybp						Fnbp4		C3		Rnf214		Rdh11		Parp12		Klhl22		Gpn3		C330006A16Rik		Arl6ip1		Il1f6
Trafd1				I830012O16Rik		Cirh1a		Trim34a		Akap13						Frmd4a		C330018D20Rik		Iqsec2		Hsp90aa1		Zfp619		Coq5		Gpr183		Cacfd1		Psmb10		Slc43a3
Parp12				Iffo2		Cited2		Trim12a		Rab11fip1						Gbp7		Cacna1d		Gm7609		Inhba		Trim30a		Fam219b		Grn		Casp2		Mlkl		Eif3j1
Trim30a				Ifi203		Clcf1		Trim12c		Mapk6						Gbp9		Camk1		Aida		Gtpbp4		Nlrc5		Tiparp		H2-D1,H2-L		Cbr3		Casp1		Pygb
Smco4				Ifi205		Cln5		Trim30b		Ptpn23						Gimap1		Camk1d		Mitd1		Fst		Tor1aip2		Hspa2		H2-DMa		Cbx4		Pcsk7		Mapre1
Ttc39c				Ifi27l2a		Cnbp		Trim30a		Adora2b						Git1		Casp2		Sf3b1		Vcl		Tlk2		Zbtb11		H2-M3		Cby1		Elovl5		Raly
				Ifitm3		Cnot7		Arl6ip1		Eif4a1						Gkap1		Cblb		Fzd5		Prkcd		Papd7		Cks2		H2-T10		Ccdc28b		Keap1		Aar2
				Ifitm6		Cnppd1		Tmco3		Dld						Gm10865		Cbr3		C130026I21Rik		Tep1		Fscn1		Snx18		H2-T22,H2-T9		Ccdc71l		Iqsec2		Dlgap4
				Igsf8		Cnpy3		Ddx60		Rdh11						Gm1966		Cby1		Card9		Tra2b		Trim56		Cdc42bpg		H2-T23		Ccrn4l		Nrp2		Surf4
				Iigp1		Cnpy4		Psmb10		Hsp90aa1						Gm4951		Ccdc134		Xpr1		Cldn1		Il27		4933416M07Rik		H2-T24		Cd84		Gm7609		Slc2a6
				Il15ra		Commd2		Mlkl		Fst						Gm5431		Ccdc61		Tor3a		Eif1a		Gatad2a		Stard5		Hif1a		Cdc34		Sp140		Cd44
				Il18bp		Copg2		Casp1		Cldn1						Gm6034		Ccdc85b		Fam20b		Mex3c		Pigb		Rpl5		Hist1h4c		Cdc42se2		Eif4e2		Ncoa5
				Il21r		Cox7a1		Pcsk7		Stk38						Gm7609		Ccnd3		Mndal		Txnl1				Traf5		Hmgn3		Cdkn2aipnl		Zcchc2		Ythdf1
				Il3ra		Cpd		Elovl5		Mex3c						Gm8979		Ccrn4l		Ifi203		Smndc1				Mrpl39		Hn1		Cdkn2b		B3galt2		Slc7a11
				Incenp		Cpsf6		Sh3bgrl2		Txnl1						Gna15		Cd84		Ppp2r5a		Cacul1				Pp2d1		Hn1l		Cdpf1		Acbd6		Pdcd10
				Irgm2		Cpt2		Uba7		Smndc1						Gnb4		Cdc34		Stat2		Abtb2				Gm21949,Iqcj,Schip1		Hp1bp3		Cds2		Slc19a2		Plekho1
				Irs2		Cs		Acaa1a		Ap5s1						Gnptg		Cdc42bpg		Pcmt1		Ap5s1				Fbxl3		Hsh2d		Cebpzos		Sde2		Rps6ka1
				Jmjd6		Csf1		Keap1		Optn						Gns		Cdc42ep3		Aim1		Optn				BC037034		Htatip2		Cecr5		Aida		Sept11
				Kdr		Ctsh		Rnf214		Spata2						Gpnmb		Cdc42se2		Rab21		Abi1				Vcl		Hyal1,Nat6		Cep170		Mitd1		Pcgf3
				Keap1		Ctu1		Parp3		Larp1b						Grn		Cdca4		Ifi47,Olfr56		Sdc4				Prkcd		I830012O16Rik		Cep19		Sf3b1		Denr
				Kif2a		Ctu2		Uba1		Dnttip2						Gsap		Cdk17		Igtp		Ptx3				Nfkb2		Iffo2		Cep250		Clk1		Fzd1
				Klhl17,Mir7658		Cx3cl1		Diap2		Eif4e						Gss		Cdkn2b		Slfn5		Dnttip2				Tnfsf15		Ifi203		Chaf1b		C130026I21Rik		Usp12
				Klra2		Cyp4f18		Iqsec2		Rnf4						Gtf2h2		Cebpzos		Stard3		Eif4e				Tmem126b		Ifi205		Chchd4		D1Ertd622e		St7
				Kmt2d		Cyth1		Nrp2		Ptpn12						H2-D1,H2-L		Cfb		Ifi35		Ufm1				Fbxl5		Ifi44		Chid1		2900060B14Rik		Ing4
				Leng9		D330041H03Rik		Gm7609		Nup54						H2-M3		Ch25h		Kremen1		Ube2j1				Ap3m2		Ifitm3		Chmp2a		Ier5		Mtpn
				Llgl1		D930015E06Rik		Ccdc93		Rnf6						H2-T10		Chaf1b		Actr2		Sfpq				Mapk8		Igf1		Chpf2,Mir671		Xpr1		Zc3hav1
				Lpcat2		Dcps		Cd244		Tes						H2-T22,H2-T9		Chid1		Aftph		Tnfsf15				Sf1		Igsf8		Ckap4		Tor3a		Fam168a
				Lrch1		Ddit4		Aida		Ptpre						H2-T23		Chpf2,Mir671		Pttg1		Ptpn12				Crtc2		Iigp1		Ckap5		Fam20b		Furin
				Lrrk2		Ddx27		Mitd1		Plet1						Hdac7		Cirh1a		Gm5431		Nup54				Nr4a3		Il18bp		Clec4a2		Uap1		Ccl17
				Mark4		Ddx3x		C130026I21Rik		Bcl2a1a						Herc3		Clcf1		Hn1		Rnf6				Gmeb1		Itga4		Clec4a3		AI607873		Htra4
				Mat2a		Dennd4a		Mapkapk2		Bcl2a1b						Hif1a		Clec4a2		Cmpk2		Lancl2				Psmd1		Itprip		Cln5		Mndal		Dnaja2
				Max		Dennd4b		Card9		Bcl2a1c						Hist3h2a		Clec4a3		Psma3		Aebp2				Igf1r		Jmjd6		Cluap1		Ifi203		Tpbg
				Mb21d1		Dgat2		Xpr1		Hccs						Hmgn3		Clk3		Dync1h1		Nfkbib				Cnot7		Jup		Cnpy4		Ppp2r5a		Limd1
				Mcam		Dgkd		Tor3a		Traf2						Hn1		Cln5		Rsad2		Irf2bp2				Scfd1		Kars		Cnr2		Mtfr2		Syncrip
				Med9		Dhcr7		Fam20b		Cdk5r1						Hn1l		Cluap1		Tmem229b		Plet1				Dtx2		Kdr		Coa3		Gja1		Bcl2a1d
				Mfsd7b		Dnajb5		Mndal		Limk2						Hp1bp3		Cnbp		Arel1		Bcl2a1a						Klhl17,Mir7658		Cog1		Sowahc		Uba5
				Mgst1		Dnajc1		Ifi203		Jdp2						Hsh2d		Cnppd1		Snw1		Bcl2a1b						Klhl18		Cog7		Prtn3		Lztfl1
				Mir1249		Dnajc11		Ppp2r5a		Six1						Htatip2		Cog1		Serpinb9		Bcl2a1c						Klhl26		Commd5		Pcmt1		Pim2
				Mir192		Dnajc16		Mtfr2		Ppp1r21						I830012O16Rik		Commd2		Rgs14		Vps26b						Klra2		Coq9		Aim1		Acot9
				Mir29a		Dnajc9		Arhgap18		Ube2d3						Idua		Cops2		Ap3b1		Rasa2						Kmt2d		Coro1c		Rab21		Gyk
				Mir30d		Dock7		Stat2		Pip5k1a						Iffo2		Cox7a2l		Parp8		Hccs						Kmt2e		Cpped1		Pnpt1		Morf4l2
				Mir6385		Dot1l		Pcmt1		Zc3h12a						Ifi202b		Cpd		Peli2		G530011O06Rik						Lpcat2		Cpt2		Ifi47,Olfr56		Acsl4
				Mir6972		Dpp7		Aim1		Ldlrap1						Ifi203		Cpne8		Pnp		Cdca4						Lrrk2		Cs		Mgat1		Vta1
				Mir7653,Tlcd1		Dpp8		Rab21		Rhof						Ifi205		Cpsf6		Pnp2		Polr3d						Ly6c1		Csf1		Gm12250		Dnajb9
				Mir7672,Pde12		Dpys		Ifi47,Olfr56		Il17ra						Ifi27l2a		Csrp2bp,Pet117		Rnf31		Gm8221						Map6		Csrp2bp,Pet117		Igtp		Hist1h4b
				Mir7679		Dtnbp1		Mgat1		Dhx34						Ifi44		Ctdp1		Phf11c		Brix1						Mark4		Ctdsp1		Slfn5		Nr1d2
				Mir8112		Dtwd1		Igtp		Abhd17c						Ifi44l		Ctsh		Setdb2		Adnp						Max		Ctnnbip1		Stard3		1810013L24Rik
				Mitd1		Dusp2		Slfn5		Capns2						Ifi47,Olfr56		Ctsz		Tmem184b		Ube2d3						Mbd2		Ctrcos		Ifi35		Prn,Prnd,Prnp
				Mndal		Dynlt1b		Stard3		Phldb1						Ifih1		Ctu1		Usp25		Ythdf2						Mcam		Ctse		Kremen1		Flrt3
				Mocs1		E030011O05Rik,Zbtb38		Ifi35		Nck1						Ifit1		Ctu2		Morc3		Stim2						Mcf2l		Ctsh		Aftph		Zfp655
				Morc3		E130218I03Rik		Kremen1		Xcr1						Ifit3		Cx3cl1		Mx1		Gm20362						Mgarp		Ctu1		Pttg1		Akap7
				Mov10		E230016M11Rik		Aftph		Hnrnpab						Ifitm3		Cxcl16		Snrpc		Nip7						Midn		Ctu2		Gm5431		Dse
				Mpp1		E2f5		Pttg1		Akap2						Ifngr2		Cyp51		Daxx		Ccl9						Mir1945		Cx3cl1		Cmpk2		Marcks
				Mrpl22		Ebi3		Gm5431		Dcun1d5						Igf1		D030056L22Rik		Trim26		Purb						Mir1954		Cyb5d1		Psma3		Slc16a10
				Mrpl54		Ece1		Cmpk2		Tmem251						Igsf8		D17H6S53E		Mir6972		Rel						Mir3058		Cyb5r1		Dync1h1		Ddx21
				Mrps12		Edc3		Psma3		Zfp263						Iigp1		D330041H03Rik		Fez2		Hnrnpab						Mir30d		Cyp4f13		Rsad2		Nfic
				Ms4a4c		Edil3		Dync1h1		Dnajb5						Il15ra		D330045A20Rik		Iigp1		Zkscan17						Mir320		Cyp4f16		Tmem229b		Nfyb
				Mt3		Eef1e1		Rsad2		Nfe2l1						Il18bp		Dab2		Mbd2		Gm16515						Mir5618		Cyp4f18		Arel1		Cry1
				Mtfr2		Efhd2		Tmem229b		Eif4a3						Il21r		Dcaf5		Tcof1		Cdc27						Mir6385		Cyth3		Snw1		Lemd3
				Mtx1		Eid1		Arel1		Yrdc						Irgm1		Ddb2		Cd274		Pum2						Mir688		D17H6S53E		Serpinb9		Cpeb4
				N4bp1		Eif2b2		Snw1		Smarca5						Kars		Ddx27		Ifit1		Mterfd1						Mir6922		D330041H03Rik		Rgs14		Ubtd2
				Napepld		Eif3b		Rgs14		Pak1ip1						Kat2b		Dennd1a		Ccnj		Mdp1						Mir6963		D330045A20Rik		Ap3b1		Lcp2
				Narf		Eif3g		Parp8		Ndfip2						Kctd1		Dennd4b		Ttc9c		Qk						Mir6972		Dcps		Parp8		Pwwp2a
				Ncoa7		Eif4a1		Peli2		Haus4						Kdr		Dgat2		Gm14446		Ammecr1l						Mir7653,Tlcd1		Ddx27		Peli2		Pmp22
				Ndufv3		Eif4g3		Pnp		Arhgap31						Klhl17,Mir7658		Dgcr6		Frmd4a		Cstf2t						Mir7672,Pde12		Ddx56		Pnp		Rdh12
				Ninj1		Elk3		Pnp2		Fance						Kmt2d		Dgkq		Il15ra		Mark2						Mir7678,Slpi		Deb1		Pnp2		Erbb2ip
				Nmi		Enc1		Rnf31		Ccdc94						Kremen1		Dhcr7		Edf1		Olfr1033						Mir7679		Decr2		Rnf31		Mapk8
				Nucb2		Enkd1		Phf11c		Stip1						Leng9		Dirc2		Gca		Eif2s2						Mir8112		Dennd1a		Phf11c		Mtmr12
				P2ry13		Epc1,Mir1893		Setdb2		Celf1						Lhfpl2		Dnajb1		Slc1a2		Akap2						Mirlet7i		Dgat2		Setdb2		Golph3
				Parp8		Ephx1		Tmem184b		Src						Lrpap1		Dnajb5		AA467197,Mir147		Pabpc4						Mndal		Dgcr6		1110038F14Rik		Samsn1
				Pde1b		Ephx2		Usp25		Zer1						Lrrk2		Dnajc1		Chmp4b		Mul1						Mocs1		Dgkd		Tmem184b		Ezr
				Pdia3		Ereg		Daxx		Dgkz						Magee1		Dnajc11		Ogfr		Gm12505						Mov10		Dgkq		Pmm2		Etf1
				Perm1		Erh		Trim26		Sf3b4						Map6		Dnajc21		Agpat2		Ppp1cb						Mpp1		Dleu2		Usp25		Zc3h15
				Pfn1		Ermard		Mir6972		Setd7						March9		Dnajc9		Rbm43		Hnrnpf						Mrpl21		Dnajb5		Morc3		Gmeb2
				Phc2		Errfi1		Fez2		Exosc10						Mark4		Dnlz		Nmi		Gtf2h1						Mrpl22		Dnajc1		Mx2		Nmd3
				Phf11a		Exoc3l4		Iigp1		Akirin1						Max		Dnmt3l		Bambi-ps1		Aagab						Mrpl54		Dnajc9		Mx1		Lrrc8d
				Phf11c		Exoc6		Mbd2		Vamp3						Mb21d1		Dock7		Gm14005		Dnmt1						Mrps28		Dnmt1		A930015D03Rik		Sbds
				Phf6		Exosc3		Batf2		Atp2a2						Mfsd7b		Dok7		Rrbp1		Cdv3						Ms4a4c		Dnmt3l		Trim26		Gpr85
				Phospho2		F10		Cd274		Mdfic						Mgst1		Dstyk		5430405H02Rik		Uqcrfs1						Mt1		Doc2g		Plcl2		Rybp
				Phtf1os		F3		Ifit1		Zfp422						Miip		Dtnbp1		Sla2		Fbxl3						Mtfr2		Dock7		Mir6972		Fbrs
				Plcl2		Fam107b		Ccnj		Vasp						Milr1		Dtwd1		Znfx1		Nup50						Mtx1		Dok2		Fez2		4933416M07Rik
				Plekhf2		Fam136a		Ttc9c		Mesdc1						Mir1249		Dtymk		Pmepa1		Zfp800						N4bp1		Dok7		Iigp1		Icam1
				Plin2		Fam169b		Gm14446		Chtf8						Mir22,Mir22hg		Dusp1		Car13		Smarca5						Ncoa7		Dolpp1		Tcof1		Mapk6
				Pnp2		Fam172a		Frmd4a		Eef1a1						Mir222		Dusp5		Cct3		Ddx24						Ndufv3		Dpp7		Batf2		Ptpn23
				Ppfibp1		Fam179b		Il15ra								Mir6972		E130309D02Rik		Adar		Cks2						Nfatc2ip		Dstyk		Cd274		Adora2b
				Ppm1k		Fam219a		Ogfr								Mir7672,Pde12		E2f5		Gbp7		Papd7						Ninj1		Dtnbp1		Ifit1		Myo1g
				Ppp1r35		Fam46c		Agpat2								Mir7678,Slpi		Ebi3		Gbp3		Arhgap31						Nmi		Dtymk		Ccnj		Eif4a1
				Ppp2r5a		Fam49a		Rbm43								Mir7679		Ece1		Gnb4		Rcl1						Nod1		Dusp23		Ttc9c		Odc1
				Prdx5		Fam69a		Nmi								Mir8112		Eea1		Psmb4		Stip1						Nop56		Dusp6		Frmd4a		Rdh11
				Prorsd1		Fam71f2		Bambi-ps1								Mndal		Eef1a1		Gpsm2		Exosc10						Nqo1		E2f1		Gca		Inhba
				Psmb10		Fam89b		Gm14005								Mocs1		Eef2		Lyn		Vamp3						Nuak2		E2f5		Slc1a2		Gtpbp4
				Pttg1		Fancc		Rrbp1								Morc3		Efhd2		Fabp3		Zbtb46						Nucb2		E2f6		Ogfr		Bdp1
				Pydc3		Farsa		5430405H02Rik								Mov10		Egln2		Hdac1		Siah2						Nudc		E430025E21Rik		Agpat2		Vcl
				Pydc4		Fbf1		Sla2								Mpp1		Egln3		Xkr8		Ptafr						Nudt22		Ecd		Rbm43		Prkcd
				Pyhin1		Fbxo33		Znfx1								Mr1		Egr1		Isg15		Slbp						Parp8		Ece1		Nmi		Cldn1
				Qpct		Fbxo34		Pmepa1								Mrpl22		Ehmt1		Lap3		Rnf24						Pde1b		Edc3		Bambi-ps1		1700021K19Rik
				Rasa4		Fbxw8		Tnfsf10								Mrps12		Eif1a		Oasl1		Oser1						Perm1		Eef1e1		Gm14005		Stk38
				Rfx5		Fermt3		Adar								Mrps28		Eif2b2		Oas1b		Lrrc8c						Phc2		Efhd2		Rrbp1		Eif1a
				Rgl2		Fgd6		Gbp7								Mx1		Eif3a		Rnf34		Gtf2i						Phf11a		Ehmt1		5430405H02Rik		Txnl1
				Rgs10		Fhl3		Gbp3								Mx2		Eif3b		Tpst1								Phf11c		Eid1		Sla2		Smndc1
				Rhoc		Firre		Gnb4								N4bp1		Eif3e		Rasa4								Phf6		Eif2d		Znfx1		Abtb2
				Rn45s		Fkbp1b		Gpsm2								Ndufb6		Eif3f		Gbp4								Phtf1os		Eif3b		Pmepa1		Ap5s1
				Rnf139		Flrt3		Lyn								Ninj1		Eif3g		Gbp6								Piga		Eif3g		Tnfsf10		Optn
				Rnf31		Fmnl3		Hdac1								Nln		Eif3h		Trafd1								Pla2g4a		Eif4a1		Adar		Abi1
				Rpl3		Foxj2,Mir7231		Xkr8								Nlrc5		Eif3k		Actb								Plac8		Enkd1		Sort1		Larp1b
				Rrbp1		Frmd6		Isg15								Nmi		Eif4a1		Ccz1								Plcl2		Enthd2		Gbp7		Eif4e
				Rrp1b		Furin		Lap3								Nod1		Elovl1		Capza2								Plekho1		Epc1,Mir1893		Gbp3		Ufm1
				Rsbn1		Galnt10		Rufy3								Nucb2		Emr1		Gimap1								Pnp2		Ephx1		Gnb4		Rnf4
				Scimp		Gar1		Oasl1								Nudt17		Enc1		Tuba8								Pomp		Ephx2		Psmb4		Ptpn12
				Sec24d		Gas2l1		Oas1b								Oas2		Enkd1		Usp18								Ppp1r3b		Eral1		Gpsm2		Nup54
				Sema4c		Gatm		Rnf34								Oasl1		Epc1,Mir1893		Parp11								Ppp2r5a		Ermard		Lyn		Rnf6
				Sept8		Gbf1		Tpst1								Oasl2		Eral1		Etnk1								Prdx5		Ermp1		Fabp3		Lancl2
				Serpinb1a		Gcn1l1,Mir7029		Rasa4								Parp12		Erh		Samd9l								Prdx6		Exoc3l4		Hp1bp3		Ptpre
				Setdb2		Gdf3		Gbp4								Parp8		Ermard		Vamp8								Prkd2		Exoc6		Plekhf2		Irf2bp2
				Sipa1l1		Gm12942		Gbp6								Parp9		Ermp1		Zfp619								Psmb10		Exosc3		Hdac1		Bcl2a1a
				Slamf8		Gm14548,Lilra6,Pira1,Pira11,Pira2,Pira6,Pira7		Trafd1								Pde1b		Eva1b		Atp10a								Psmb3		F10		Xkr8		Bcl2a1b
				Slc25a10		Gm1821		Capza2								Pdgfrb		Exoc3l4		Whamm								Psmb8		F3		Isg15		Bcl2a1c
				Slc35b1		Gm20741		Zyx								Perm1		Exosc3		Axl								Psme1		Fabp7		Lap3		Rasa2
				Slc37a2		Gm20748		Gimap1								Pex7		F10		Slco3a1								Ptgr1		Faf2		Oasl1		Hccs
				Slc6a4		Gm9895		Tuba8								Pfkfb3		F3		Trim30d								Pttg1		Fam169b		Oas1b		G530011O06Rik
				Slc6a8		Gnb2l1		Usp18								Phc2		Fabp7		Gm1966								Pydc3		Fam172a		Rnf34		Traf2
				Slfn1		Gnl2		Parp11								Phf11a		Faf2		Mvp								Pydc4		Fam173a		Rasa4		Hsd17b12
				Slfn3		Gnl3		Etnk1								Phf11c		Fam107b		Slc25a22								Rasa4		Fam219a		Gbp4		Phf23
				Slfn4		Golph3l		Cycs								Phtf1os		Fam122a		Tmem192								Rdh14		Fam219b		Gbp6		Cdk5r1
				Smc3		Gp49a		Nt5c3								Pla2g4a		Fam169b		Tpm4								Rfx5		Fam3a		Trafd1		Limk2
				Snapc1		Gpaa1		Vamp8								Plac8		Fam172a		Nlrc5								Rgs10		Fam46c		Capza2		Map3k14
				Snn		Gpatch11		Zfp619								Plcl2		Fam219a		Usb1								Rn45s		Fam49a		Zyx		Jdp2
				Snord12		Gpn2		Whamm								Plekhn1		Fam219b		Tma16								Rnf139		Fam53a		Gimap1		Cdca4
				Snx30		Gpr65		Il21r								Plin2		Fam46c		Il15								Rnf31		Fam58b		Tuba8		Cdyl
				Sphk2		Gramd4		Axl								Pnp2		Fam49a		Maf								Rpl3		Fam69a		Usp18		Pspc1
				Srgap2		Grina		Slco3a1								Ppap2a		Fam53a		Gmppb								Rsbn1		Fam86		Parp11		Gm8221
				Stard3nl		Grwd1		Trim30d								Ppif		Fam69a		Cmtm6								Rtn4rl2		Farsa		Etnk1		Brix1
				Stat2		Gse1		Mvp								Ppm1k		Fancc		Azi2								Samd9l		Fbf1		Samd9l		Rnd1
				Stfa2		Gstm2		Slc25a22								Ppp1r35		Farsa		Rap2c								Sec24d		Fcrlb		Cycs		Pknox1
				Suds3		Gsto1		Tmem192								Ppp2r5a		Fau		Slc25a19								Sema4c		Fgd6		Vamp8		Mpp7
				Tbc1d10b		Gtf2b		Tpm4								Prdx5		Fbxw8		Fus								Serpinb1a		Firre		Zfp619		Sfr1
				Tcirg1		Gtpbp4		Nlrc5								Prrc2a		Fchsd2		Ppp4c								Setd1b		Fkbp1b		Whamm		Nek6
				Thoc6		H2-Q5		Tma16								Psmb10		Fcrlb		Sirt1								Setdb2		Fkbp4		Axl		Il1bos
				Tifa		Hamp		Il15								Psmb8		Fgfr1op		Wsb1								Sh3bp2		Fkbpl		Slco3a1		Adnp
				Tmem107		Hccs		Kars								Psme1		Firre		Zbtb11								Slamf8		Fra10ac1		Trim30d		2410004B18Rik
				Tmem184b		Heatr6		Maf								Pttg1		Fkbp1b		Trem1								Slc35b1		Furin		Gm1966		Pip5k1a
				Tmem2		Hivep3		Gmppb								Pydc3		Flcn		Crem								Slc6a4		Fut11		Mvp		Gnl2
				Tmem230		Hmgn1		Azi2								Pydc4		Fnip1		Bcl2l11								Slc8b1		Fuz		Slc25a22		Lrrc47
				Tmem80		Homer3		Pml								Rab21		Fopnl		Rbm15								Slfn1		Galk2		Tmem192		Zc3h12a
				Tnfsf10		Hook2		Snx14								Rasa4		Fosb		Klhl25								Slfn3		Galnt10		Tpm4		Ldlrap1
				Tnfsf8		Hpse		Rap2c								Rfx5		Furin		Rbbp6								Slfn4		Galt		Nlrc5		Stim2
				Top3a		Hrsp12		Phlda1								Rhoc		Fut11		Itpkc								Smc3		Gar1		Usb1		Pxn
				Tradd		Hspd1		Kpna4								Rn45s		Fzd7		Arih2								Snn		Gas2l1		Tma16		Antxr2
				Trafd1		Icmt		Fus								Rnf139		Galnt10		Triobp								Snord12		Gas2l3		Kars		Casp2
				Trem3		Id2		Ppp4c								Rnf217		Gar1		Zdhhc9								Snord43		Gatm		Maf		Mad2l1
				Treml2		Id3		Ndrg1								Rnf31		Gas2l1		Socs7								Snrpc		Gbf1		Gmppb		Swap70
				Trim12a		Idh3a		Crem								Rrbp1		Gbf1		Srsf5								Snx27		Gdf3		Cmtm6		Abhd17c
				Trim30b		Idh3g		Rbm39								Rsad2		Gdf15		Psd								Sp3		Gipr		Azi2		Dennd5a
				Trim34a		Ier5l		Dyrk2								Samd9l		Gdf3		Slc7a8								Srsf9		Git1		Pml		Nip7
				Triobp		Ifitm1		Jarid2								Sdf2l1		Gipr		Dach1								St3gal3		Glg1		Hmgn3		Rhou
				Trmt61b		Ifitm2		Asun								Sec24d		Glg1		Maff								Stard3nl		Glo1		Snx14		Hyal1,Nat6
				Trp53inp1		Ift27		Adap2								Sema4c		Gltscr2		Parp14								Stard4		Gm12942		Rap2c		Xcr1
				Tspyl2		Igfbp4		Top3a								Sept8		Gm10872		Dtx3l								Stfa2		Gm14548,Lilra6,Pira1,Pira11,Pira2,Pira6,Pira7		Phlda1		Mid1
				Tuba8		Il10		Pdlim5								Serf1		Gm11974		AI837181								Suds3		Gm20748		Rdh9		Ccl9
				Tyk2		Il10ra		Map3k2								Serpinb1a		Gm12191,Rpl30		Ubtd1								Taf12		Gm5150		Ptgr2		Tmem104
				Ubtd1		Il10rb		Impa2								Setd1b		Gm15645		Sfxn2								Tap1		Gm9895		Snn		Hnrnpab
				Unc50		Il17ra		Zfp622								Setdb2		Gm16702		Trp53i11								Tapbp		Gnpat		B4galt5		Zkscan17
				Usp40		Il19		Actn1								Sgms1		Gm1821		Ifih1								Tbc1d10b		Golim4		Kpna4		Egln3
				Vamp8		Il1a		Ero1lb								Slamf8		Gm1821,Ubb		Rnf114								Tbxas1		Gp49a		Tmem55a		Alkbh1,Nrp
				Vcpkmt		Il1r1		Ptger2								Slc25a10		Gm20748		Rfx5								Tcirg1		Gpaa1		Sirt1		Mterfd1
				Wfdc17		Il1rl2		Slc7a8								Slc25a43		Gnl2		Coro2a								Tet2		Gpatch11		Gna11		Naa30
				Xrn1		Il4i1,Nup62,Nup62-il4i1		Dach1								Slc35b1		Gnl3		Themis2								Thoc6		Gpn1		A130077B15Rik		Cln5
				Zc3h7b		Ilvbl		AI837181								Slc6a4		Golim4		Agrn								Thyn1		Gpr137		Wsb1		Elp3
				Zcchc6		Impdh2		Ubtd1								Slc6a8		Golph3l		Pomp								Tifa		Gpr146		Ccnk		Zhx2
				Zfp513		Ing5		Fads2								Slco3a1		Gp49a		Fbxl14								Tmem107		Gpr157		Fbxo33		Cluap1
				Zfp609		Ino80e		Mical3								Slfn1		Gpatch11		3110062M04Rik								Tmem184b		Gpr180		1700016G22Rik		Lrrc58
				Zfp619		Inpp5b,Mir698		Rora								Slfn3		Gpn2		Tarm1								Tmem2		Gpr68		Hist1h4i		Filip1l
				Zfp653		Inpp5j		Rnf114								Slfn4		Gpr137										Tmem206		Gramd4		Atf4		Cpox
				Zyx		Ipo5		Rfx5								Snn		Gpr171										Tnfsf10		Grk6		Ndrg1		Axin1
						Irf4		Tifa								Snord12		Gpr180										Tnpo1		Grwd1		Trem1		Trip10
						Itfg3		Coro2a								Snx27		Gpr35										Tpgs1		Gsto1		Crem		U2af1
						Itgal		Themis2								Sppl2a		Gpr68										Tradd		Gstz1		Mir3473f		Tcerg1
						Itpa		Agrn								Stab1		Gpr89										Trafd1		Gtf2h3		Bcl2l11		Mark2
						Itpkc		Pomp								Stard3nl		Gramd1a										Treml2		Gtf2h4		Rbm15		Tank
						Itsn1		Mxd1								Stat2		Grina										Trim30b		Gtf2ird2		Pde4b		Ube2e3
						Izumo4		3110062M04Rik								Stat3		Grwd1										Triobp		H2-DMb1		Errfi1		Itgav
						Jdp2		Tarm1								Stk19		Gstm2										Trmt61b		Haghl		Cpeb2		Mir5129,Zeb2
						Josd2		Tyk2								Suds3		Gsto1										Trp53inp1		Hamp		Areg		Galnt3
						Katnbl1										Taf15		Gstt2										Tsc22d1		Hcfc1		Ap5z1		Eif2s2
						Kbtbd4										Taok3		Gstz1										Tuba8		Heatr5b		Pglyrp1		Mir6340
						Kctd17										Tap1		Gtf2e2										Tubg1		Heatr6		Adm		Naa15
						Kctd18										Tapbp		Gtf2h3										Ube2l6		Hectd3		Rbbp6		Isg20l2
						Kctd2										Tapbpl		Gtpbp4										Ubtd1		Hivep3		Gltscr2		Akap2
						Kctd7										Tcirg1		Gtpbp6										Unc50		Hltf		Itpkc		Pabpc4
						Kif3c										Thoc6		Gypc										Usp40		Hmbs		Gdf15		Mul1
						Klf16										Tifa		H2-Aa										Uxt		Hmg20a		Taf1d		Gm12505
						Klf2										Tigd2		H2-Ab1										Vamp8		Hook2		Arih2		Rnf11
						Klf7										Tmem184b		H2afz										Vcpkmt		Hspd1		Gm6377		Ccdc28b
						Kras										Tmem2		Hamp										Wfdc17		Icmt		Ngfrap1		Smim1
						Kti12										Tmem219		Hbegf										Wfs1		Id2		Ncoa7		Klhl5
						Kxd1										Tmem55a		Hccs										Whamm		Ide		Zufsp		Fam20c
						L3mbtl2										Tmx3		Heatr5a										Wnt6		Idh3g		Vps54		Phtf2
						Lamtor3										Tnfrsf21		Heatr5b										Xrn1		Ier5l		Larp1		Slc7a1
						Leo1										Tnks1bp1		Heatr6										Zbp1		Iffo1		Irgm2		Hnrnpf
						Letmd1										Top3a		Heca										Zbtb1		Ifitm2		Rab8b		Clec5a
						Limk2										Trafd1		Helb										Zc3h7b		Igfbp4		Jarid2		Gtf2h1
						Lin54										Treml2		Herpud1										Zcchc6		Il17ra		Triobp		Fchsd2
						Lipe										Trim30a		Hilpda										Zfp609		Il1r1		Adap2		Aamdc
						Litaf										Trim30b		Hist1h2bc										Zfp619		Il1rl2		Phldb1		Mak16
						Llgl2										Trim30d		Hist1h4b										Zfp768		Inip		Top3a		Zfp868
						Lpar1										Trim56		Hist1h4i										Zyx		Ino80b		Rabggta		Ist1
						Lrrc16a										Triobp		Hivep3												Ino80e		Sgms2		Dcun1d5
						Lrrc25										Trmt61b		Hmg20a												Inpp5b,Mir698		Ypel2		Aagab
						Lrrc47										Tsc22d1		Hmgn1												Inpp5j		Npepps		Eif3g
						Ltv1										Tuba8		Hnrnph3												Ints10		Pcgf2		Dnmt1
						Lyar										Tubgcp4		Hnrnpll												Ints5		Nr1d1		Cdv3
						Mad2l1										Tyk2		Homer3												Ipo5		Dcakd		Pbdc1
						Maff										Ube2l6		Hook2												Isoc2b		Arg2		Elp5
						Mafk										Ubtd1		Hrsp12												Itgal		Lpin1		Tmem251
						Magoh										Unc50		Hspa2												Itsn1		Crebrf		Bag5
						Mak16										Unk		Hspa4l												Izumo4		Gltscr1l		Larp4b
						Map1s										Usp18		Hspa9												Jade2		Map3k2		Zfp263
						Mapre2										Vamp8		Hvcn1												Jagn1		Pmaip1		Eif4a3
						Mbtd1										Vcan		Icmt												Josd2		Impa2		Alyref
						Mcm6										Vcpkmt		Id2												Kcnk6		Adrb2		Tmem64
						Mdm2										Vps8		Ier3												Kcnn3		Cds2		Fbxl3
						Mdp1										Wfdc17		Iffo1												Kctd11		Nr4a2		Nup50
						Mef2a										Wfs1		Ifitm1												Kctd13		Cir1		Yrdc
						Mepce										Whamm		Ift80												Kctd17		Prune		Zfp800
						Mesdc1										Wnt6		Il10rb												Kctd18		Bend4		Smarca5
						Mettl2										Xaf1		Il17ra												Kctd7		Slc2a3		Sgpp1
						Mettl21a										Zbtb22		Il19												Kifap3		Dbp		Ddx24
						Mex3d										Zc3h7b		Il1rl2												Klc2		Rassf7		Pak1ip1
						Mid1										Zcchc2		Il4i1,Nup62,Nup62-il4i1												Klhl5		Zfp954		Mier3
						Mipep										Zcchc6		Impdh2												Kti12		Fosb		Flnb
						Mir1894										Zdhhc6		Ino80e												Kxd1		Ell		Kctd9
						Mir1901										Zfp488		Inpp5a												L3mbtl2		Ip6k1		Gpr180
						Mir3074-1										Zfp619		Inpp5b,Mir698												Lage3		Ifrd1		Haus4
						Mir6244										Zfp628		Inpp5d												Lamtor3		Zfp622		Slc39a14
						Mir6340										Zyx		Insl3,Jak3												Ldb1		Gdi2		Ext1
						Mir7-1												Ints12												Leo1		Ero1lb		Vps8
						Mis12												Ints5												Lipe		Hist1h2bc		Arhgap31
						Mitf												Ipo5												Litaf		Mrpl32		Gnaq
						Mpp5												Irs2												Llph		Rbm7		Rcl1
						Mpst												Isca1												Lman2l		Snx18		Stip1
						Mrpl15												Itfg3												Lonrf1		Rb1		Pkp4
						Mrpl20												Itgal												Lpar6		Lrch1		Celf1
						Mrpl46												Itsn1												Lrp1		Dach1		Dstn
						Mrps10												Izumo4												Lss		Stk24		Zer1
						Mrps2												Jagn1												Ltb4r1		Pim3		Dgkz
						Mrps22												Jdp2												Ltv1		AU019823		Sf3b4
						Mrto4												Junb												Map1s		Tomm70a		Setd7
						Msantd4												Kbtbd4												Map3k11		Carhsp1		Lphn2
						Mtf2												Kctd17												Mapre2		Dtx3l		Exosc10
						Mtmr1												Kctd18												Marveld1		Hspa1b		Tardbp
						Mtx2												Kctd6												Mast3		Hspa1a		Vamp3
						Mvk												Kctd7												Mavs		Eif2ak2,Gm6548		Rab35
						Naa10												Kdm6b												Mcat		Dcp2		Rfc1
						Naglu												Kifap3												Mcemp1		Lmnb1		Atp2a2
						Napg												Klc2												Mcm6		Tcf4		Mdfic
						Ncl												Klf16												Mdp1		Fem1c		Zfp422
						Ndel1												Klhl5												Mea1		Nfatc1		Numa1
						Ndufa6												L3mbtl2												Med18		AI837181		Mesdc1
						Ndufaf7												Lamtor3												Med24		March5		Chtf8
						Nedd9												Leo1												Mertk		Ubtd1		Erdr1
						Neil1												Limd2												Mesdc1		Sfxn2		Mina
						Nek7												Lipe												Mesdc2		Fads2		Tshz1
						Nelfcd												Litaf												Mettl16		Kin		Zfp408
						Nfkbid												Llgl2												Mettl2		March7		Gabpb1
						Ngrn												LOC101056043												Mettl20		Ssfa2		Lysmd1
						Nhp2												Lox												Mex3d		Gm14023		Hadh
						Nhp2l1												Lrp12												Mfsd5		Rbm38		Fam219a
						Nifk												Lrrc16a												Mid1		Slc25a25		Plekha2
						Nip7												Lrrc47												Miip		Ccng2		Rbm15b
						Nme6												Ltv1												Mina		Dnajb1		Lrrc8c
						Nmnat1												Ly6f												Mir1894		Trp53i11		Pop5
						Noc3l												Lyar												Mir21,Vmp1		Trim59		Ankrd17
						Nol12												Lysmd1												Mir6340		Mier1		Gtf2i
						Nolc1												Mad2l1												Mir6935		Cdkn2c		Mob1a
						Nom1												Magoh												Mir7-1		Ing3		Mthfd2
						Nop14												Mak16												Mir7035		E230016M11Rik		Cnot7
						Nop58												Map1s												Mir8097,Rnf19a		Hepacam2
						Nqo1												Map3k11												Mir8120		Gadd45a
						Nrg1												Map3k12												Mis12		Mical3
						Nsfl1c												Mapre2												Mitf		Gpi1
						Nudt5												March7												Mllt1		Ppp1r15a
						Nudt8												Med18												Mmgt2		Ing2
						Nup50												Med24												Mocs3		Junb
						Oat												Mef2a												Mon1a		Rora
						Odc1												Mertk												Mpst		Fam214a
						Ogfod1												Mesdc1												Mpv17l2		Ifih1
						Olfr856-ps1												Metrnl												Mrpl15		Rnf114
						Osbpl8												Mettl9												Mrpl42		Rfx5
						Osgin2												Mfsd5												Mrps10		Tifa
						Pabpc1												Mid1												Mrps2		Mob3b
						Pabpc4												Mid1ip1												Mrps22		Coro2a
						Pabpn1												Mier1												Mrto4		Tnfsf8
						Pbdc1												Mir142b												Mta3		Themis2
						Pcbp4												Mir1894												Mtf2		Agrn
						Pcx												Mir21,Vmp1												Mto1		Nfxl1
						Pdf												Mir3074-1												Mtss1		Cgnl1
						Pdhx												Mir5121,Rpl13a,Snord33												Mtx2		Fbxl14
						Pdlim2												Mir6340												Mum1		Mxd1
						Pea15a												Mir6935												Mvk		Trim56
						Pfkl												Mir7-1												Naa10		3110062M04Rik
						Pgap3												Mir7035												Naglu		Ppm1k
						Pgpep1												Mis12												Ncs1		Cd69
						Phf23												Mlec												Nde1		Tarm1
						Phlpp1												Mllt1												Ndufa6		Trim21
						Phpt1												Mmgt2												Nedd9		N4bp1
						Pias3												Mocs3												Nek7		Fam46a
						Pias4												Mon1a												Nelfcd
						Pigf												Mpp5												Neurl4
						Pigp												Mrgbp												Nfkbid
						Pigs												Mrpl21												Ngrn
						Pik3ap1												Mrpl3												Nhp2
						Piwil2												Mrpl32												Nhp2l1
						Pknox1												Mrpl36												Nifk
						Pla2g10os												Mrpl42												Nlk
						Plaur												Mrpl46												Nmnat1
						Plcd1												Mrps2												Nmnat3
						Plekha3												Mrps22												Noc3l
						Plekhg2												Mrto4												Nol11
						Plk2												Msantd4												Nol12
						Plscr3												Msto1												Nolc1
						Plxdc2												Mt2												Nom1
						Plxnb2												Mtf2												Nprl3
						Pno1												Mto1												Nsdhl
						Pogk												Mtx2												Nsfl1c
						Pole3												Mvk												Nt5c
						Pole4												Naca												Nt5dc1
						Polr2d												Nacc1												Nthl1
						Polr2h												Naip5												Ntpcr
						Polr2k												Napepld												Nubp2
						Polr3d												Nde1												Nubpl
						Pop7												Ndrg1												Nudt16
						Por												Ndrg2												Nudt5
						Pot1a												Ndufa6												Oat
						Ppan												Neil1												Ocel1
						Ppfia3												Nek7												Ogfod1
						Ppfibp2												Nelfcd												Ogg1
						Ppm1m												Neurl4												Ogt
						Ppp1r10												Nfil3												Orai3
						Ppp2r1b												Nfkbid												Orc5
						Pprc1												Nfyb												Oxld1
						Pqlc3												Ngfrap1												P2ry2
						Prdm2												Ngrn												P4ha1
						Prkcd												Nhp2l1												Pak4
						Prkch												Nifk												Panx1
						Prmt1												Nip7												Papd4
						Prps2												Nktr												Pbdc1
						Psmd3												Nme6												Pbxip1
						Psmd5												Nmrk1												Pced1b
						Psmg3												Nol12												Pck2
						Ptbp1												Nolc1												Pctp
						Ptch1												Nop14												Pdcd2l
						Ptdss2												Nop58												Pddc1
						Ptger4												Nr1d1												Pdf
						Ptges2												Nr4a1												Pdhx
						Ptgs2												Nr4a2												Pdk1
						Ptplad2												Nsdhl												Pea15a
						Ptpre												Nsfl1c												Pepd
						Pus1												Nt5c												Pfkl
						Pvr												Nt5dc1												Pgap2
						Pwp1												Nthl1												Pggt1b
						Pxdc1												Nub1												Phactr4
						Pycr2												Nubp2												Phf23
						Qpctl												Nudt8												Phlpp1
						Qsox1												Nufip1												Pick1
						Rabep1												Nup37												Pigf
						Rabgef1												Nup50												Pigp
						Ran												Nutf2												Pigs
						Ranbp1												Oat												Pigt
						Ranbp10												Odc1												Pik3ap1
						Rap2b												Orc5												Pinx1
						Rapgef6												Osbpl8												Piwil2
						Raph1												Osbpl9												Pla2g15
						Rassf4												P2ry2												Plcd1
						Rbbp6												P4ha1												Pld1
						Rbm15												Pabpc4												Plekha2
						Rbm3												Pabpn1												Plekhg2
						Rcsd1												Pak4												Plk2
						Rdm1												Pbdc1												Plxnb2
						Rel												Pced1b												Pno1
						Retnlg												Pcx												Pnpla6
						Rfk												Pddc1												Pnpo
						Rfng												Pdhx												Pogk
						Rftn1												Pdpn												Pole3
						Rhno1												Pea15a												Pole4
						Rhof												Pelp1												Polr2d
						Rhoq												Pgap2												Polr2h
						Rhot2,Wdr90												Pggt1b												Polr3gl
						Rhou												Pglyrp1												Pomgnt1
						Rhov												Phactr4												Pop7
						Rilpl2												Phf13												Por
						Ripk2												Phf23												Pot1a
						Rlim												Phlpp1												Ppan
						Rnd1												Pias4												Ppfia3
						Rnd2												Pick1												Ppfibp2
						Rnd3												Pigf												Ppil1
						Rnf103												Pigp												Ppil3
						Rnf220												Pigs												Ppm1f
						Rnf5												Pik3ap1												Ppm1m
						Rp2h												Pim3												Ppp1r16a
						Rpap3												Pira6												Ppp1r21
						Rpl10a												Pirb												Ppp2r1b
						Rpl11												Piwil2												Pqlc3
						Rpl18												Pknox1												Prkcd
						Rpl39												Pla2g10os												Prkch
						Rpl4												Plcd1												Prmt1
						Rpl7l1												Plekha2												Prorsd1
						Rpl8												Plekha3												Prr12
						Rpp25l												Plekhm1												Prr3
						Rps15a-ps4												Plk2												Psmd3
						Rps3												Plscr3												Psmd5
						Rps4l												Plxnb2												Psmg2
						Rps6ka2												Pmm2												Psmg3
						Rps6ka5												Pno1												Ptcd2
						Rps7												Pogk												Ptch1
						Rps8												Pole3												Ptdss2
						Rras2												Polr1c												Ptpn22
						Rrp7a												Polr1d												Ptpre
						Rrp9												Polr2k												Pus1
						Rsl1d1												Polr3d												Pvr
						Rsl24d1												Por												Pwp1
						Runx3												Pot1a												Pycr2
						Saa1												Pp2d1												Qpctl
						Samm50												Ppan												Qsox1
						Sars												Ppfia3												Rab31
						Sdc1												Ppfibp2												Rab33a
						Sde2												Ppil3												Rabif
						Sdhaf1												Ppm1f												Rac2
						Sec24a												Ppp1r16a												Ranbp10
						Selm												Ppp2r1b												Rap2a
						Sephs2												Ppp2r2d												Rap2b
						Serbp1												Pprc1												Rars2
						Serpine1												Pqlc3												Rasa3
						Sertad2												Prelid2												Rassf4
						Set												Prkch												Rbm17
						Setd7												Prmt1												Rcsd1
						Sfr1												Proz												Rdm1
						Sgpp1												Prps2												Repin1
						Sh2b2												Prr12												Rfng
						Sh3bp4												Prtn3												Rftn1
						Sh3bp5												Psmc5												Rgp1
						Sh3glb2												Psmd3												Rhno1
						Shkbp1												Psmd5												Rhoc
						Siae												Psmd8												Rhof
						Siah1a												Psme3												Rhoq
						Siglece												Psmg3												Rhot2,Wdr90
						Sipa1												Ptbp1												Rilpl2
						Sipa1l2												Ptch1												Rinl
						Sirt7												Ptdss2												Rnd2
						Slc10a7												Ptpmt1												Rnf141
						Slc16a1												Ptpn9												Rpl10a
						Slc20a1												Ptpre												Rpl11
						Slc25a15												Pus1												Rpl39
						Slc25a16												Pwp1												Rpl7l1
						Slc25a25												Pwwp2a												Rpp25l
						Slc25a3												Pxmp4												Rps15a-ps4
						Slc35a5												Qsox1												Rps4l
						Slc35b2												Rab33a												Rps6ka2
						Slc35c1												Rabep1												Rps7
						Slc38a2												Rabif												Rps8
						Slc41a1												Ramp1												Rras2
						Slc44a2												Ran												Rrp36
						Slc48a1												Rap2a												Rrp7a
						Slc6a12												Rap2b												Rrp9
						Slc7a5												Raph1												Rsl24d1
						Slc8a1												Rara												Rundc1
						Slc9a3r1												Rasd1												Runx3
						Smarcd1												Rassf4												Ruvbl1
						Smim1												Rb1cc1												Saa1
						Smim8												Rbm15b												Samm50
						Snora28												Rcsd1												Sars
						Snora3												Renbp												Sash3
						Snord4a												Repin1												Sdhaf1
						Snord73a												Rfng												Sephs2
						Snx8												Rftn1												Sepn1
						Spaca6												Rhof												Sept10
						Spatc1												Rhoq												Serbp1
						Spink2												Rhou												Serpine1
						Spsb1												Rilpl2												Set
						Srfbp1												Rnd2												Setd6
						Srgn												Rnf141												Sgk1
						Srrt												Rnf220												Sh3bp4
						Srsf2												Rpf2												Sh3bp5l
						Srsf5												Rpl10												Sh3glb2
						Stac2												Rpl10a												Shkbp1
						Stap2												Rpl11												Siae
						Stk35												Rpl12												Siah1a
						Stx6												Rpl17												Siglece
						Sumf2												Rpl18a												Sipa1
						Sun2												Rpl19												Slc22a4
						Surf6												Rpl22												Slc26a11
						Susd2												Rpl23												Slc35a5
						Swap70												Rpl23a												Slc35b4
						Taf1c												Rpl26												Slc35c1
						Taf5l												Rpl28												Slc37a3
						Tardbp												Rpl29												Slc38a7
						Tatdn2												Rpl32												Slc41a1
						Tbc1d1												Rpl34												Slc43a2
						Tbc1d10a												Rpl35a												Slc44a2
						Tbc1d8												Rpl36												Slc6a12
						Tbrg4												Rpl36a												Slc8a1
						Tcn2												Rpl37												Slc9a3r1
						Tes												Rpl37a												Smad7
						Tex30												Rpl39												Smarcd1
						Tgfbr2												Rpl6												Smg9
						Tgfbrap1												Rpl7												Smim1
						Thoc3												Rpl7a												Smpd5
						Thyn1												Rpl7l1												Snapc3
						Tigd2												Rpl9												Snora3
						Timm10												Rplp0												Snora70
						Timm17a												Rplp1												Snord42a
						Timm8a1												Rpp25l												Snord4a
						Tm9sf4												Rps10												Snord73a
						Tmem119												Rps11												Snord96a
						Tmem129												Rps12												Snrnp35
						Tmem135												Rps14												Snx8
						Tmem141												Rps15												Spaca6
						Tmem143												Rps15a-ps4												Spink2
						Tmem185b												Rps16												Spint1
						Tmem205												Rps20												Spsb1
						Tmem51												Rps21												Ssna1
						Tmem57												Rps23												St7
						Tmem62												Rps24												Stap2
						Tmem70												Rps26												Stk38
						Tmem9												Rps27												Stradb
						Tmpo												Rps27a												Stx17
						Tnf												Rps28												Stx6
						Tnfrsf9												Rps29												Susd2
						Tnfsf9												Rps4x												Swap70
						Tob2												Rps5												Tarbp2
						Traf3ip2												Rps6ka2												Tardbp
						Trappc2												Rps9												Tars2
						Trappc4												Rras2												Tatdn2
						Trim13												Rrp36												Taz
						Trim36												Rrp7a												Tbc1d1
						Trip4												Rrp9												Tbc1d8
						Trmt5												Rrs1												Tbkbp1
						Trpm4												Rsl1d1												Tbl3
						Tsen15												Rsl24d1												Tctn1
						Tsku												Runx3												Tec
						Tsr1												Rusc2												Tep1
						Tst												S100a9												Tes
						Tsta3												Sae1												Tfpt
						Tubb4a												Samd11												Tgm1
						Twistnb												Samm50												Thap11
						U2af1												Sat1												Thoc3
						Ubac2												Sbno1												Timm10
						Ubxn8												Scap												Timm17a
						Uck2												Sdad1												Timm21
						Ufl1												Sdc1												Timm22
						Uhrf1bp1												Sdhaf1												Timm8a1
						Upf3b												Selm												Tm7sf3
						Uqcc1												Sema3c												Tm9sf4
						Urb2												Serbp1												Tmc6
						Urod												Serinc5												Tmc8
						Usp21												Serpine1												Tmco6
						Utp15												Setd6												Tmem101
						Utp18												Sf3a3												Tmem106b
						Vasn												Sfr1												Tmem106c
						Vdr												Sgk1												Tmem126b
						Vimp												Sgpp1												Tmem141
						Vps9d1												Sh3bp4												Tmem143
						Wbp1												Sh3bp5l												Tmem180
						Wdr5												Sh3glb2												Tmem185b
						Wdr6												Shkbp1												Tmem205
						Wdr74												Siae												Tmem230
						Wls												Siglece												Tmem43
						Wsb1												Sipa1l1												Tmem51
						Xist												Siva1												Tmem62
						Ybx3												Slc16a1												Tmem86a
						Ythdf3												Slc25a16												Tmem9
						Zbtb11												Slc25a3												Tnfrsf12a
						Zc3h12a												Slc2a8												Tnfrsf1b
						Zcchc10												Slc35a5												Tomm40
						Zer1												Slc35c1												Tra2a
						Zfand1												Slc41a1												Traf3ip2
						Zfand2a												Slc44a2												Traf5
						Zfp263												Slc48a1												Trappc4
						Zfp275												Slc6a12												Trerf1
						Zfp422												Slc7a5												Trip4
						Zfp503												Slc8a1												Trmt5
						Zfp523												Slc9a3r1												Trmu
						Zfp703												Smim1												Tsnax
						Zhx2												Smim11												Tsr1
						Zmym2												Snhg6												Tst
						Zmym3												Snora28												Tsta3
						Zswim7												Snora3												Ttc12
						Zxdc												Snora31												Ttc13
																		Snora70												Ttll12
																		Snord4a												Ubac2
																		Snord73a												Uevld
																		Snx8												Ufl1
																		Socs1												Ulk3
																		Spire1												Upf3b
																		Sptlc1												Uqcc1
																		Spty2d1												Urb2
																		Srfbp1												Urod
																		Srgn												Usp21
																		Srsf2												Utp18
																		Ssx2ip												Vac14
																		Stap2												Vat1
																		Stk24												Vimp
																		Stk38												Vps33a
																		Stmn1												Vrk3
																		Stx6												Wdfy4
																		Sub1												Wdr13
																		Supt4a												Wdr5
																		Surf6												Wdr74
																		Susd2												Wdr8
																		Swap70												Wnk2
																		Taf1d												Xpc
																		Tarbp2												Yif1a
																		Tardbp												Zadh2
																		Tatdn2												Zbtb14
																		Tbc1d10b												Zbtb22
																		Tbc1d15												Zc3h12a
																		Tbc1d5												Zcchc10
																		Tbcc												Zcchc17
																		Tbl3												Zdhhc1
																		Tbrg4												Zdhhc6
																		Tctn1												Zdhhc7
																		Tes												Zer1
																		Tfpt												Zfand1
																		Tgfbi												Zfp362
																		Tgfbr2												Zfp422
																		Tgfbrap1												Zfp523
																		Thap7												Zfp637
																		Thoc3												Zfp692
																		Timm17a												Zfp703
																		Timm21												Zfp932
																		Timm50												Zmym3
																		Timm8a1												Zmym6
																		Tm9sf4												Zmynd15
																		Tmc6
																		Tmc8
																		Tmcc3
																		Tmco6
																		Tmem11
																		Tmem110
																		Tmem127
																		Tmem135
																		Tmem141
																		Tmem143
																		Tmem176a
																		Tmem176b
																		Tmem185b
																		Tmem205
																		Tmem223
																		Tmem251
																		Tmem39a
																		Tmem57
																		Tmem70
																		Tmem9
																		Tnfsf13b
																		Tob1
																		Toe1
																		Tomm20
																		Tomm5
																		Tpt1
																		Traf3ip2
																		Tram2
																		Trappc13
																		Trappc4
																		Trem3
																		Trim8
																		Trip4
																		Trmt5
																		Trpm4
																		Trub2
																		Tsen15
																		Tsen54
																		Tsfm
																		Tsr1
																		Tssc1
																		Tst
																		Tsta3
																		Ttll12
																		Tusc1
																		Twistnb
																		Txnip
																		U2af1
																		Uba52
																		Ubac2
																		Ube2b
																		Ube2h
																		Ube4a
																		Ubxn8
																		Uck2
																		Ulk3
																		Uqcc1
																		Uqcrfs1
																		Urb2
																		Urod
																		Use1
																		Usp21
																		Utp15
																		Utp18
																		Vac14
																		Vimp
																		Vps37b
																		Vps39
																		Wbp1
																		Wbp5
																		Wbscr22
																		Wdfy4
																		Wdr13
																		Wdr33
																		Wdr48
																		Wdr5
																		Wdr8
																		Wipi1
																		Wnk2
																		Yif1a
																		Zadh2
																		Zc3h12a
																		Zcchc10
																		Zcchc17
																		Zdhhc1
																		Zdhhc7
																		Zer1
																		Zfand2a
																		Zfp275
																		Zfp276
																		Zfp292
																		Zfp35
																		Zfp36
																		Zfp422
																		Zfp568
																		Zfp622
																		Zfp637
																		Zfp653
																		Zfp655
																		Zfp688
																		Zfp703
																		Zfp746
																		Zhx2
																		Zmpste24
																		Zmym3
																		Zmynd15
																		Zranb1
																		Zxdc

## Sheet: B - APP
Gamma_WT\M			Gamma_WM\T			Theta_WT\M			Theta_WM\T			Omega_WT\M			Omega_WM\T
GO Term	FDR		GO Term	FDR		GO Term	FDR		GO Term	FDR		GO Term	FDR		GO Term	FDR
positive regulation of determination of dorsal identity	1		response to interferon-beta	0.000139		regulation of interleukin-6 production	1		response to interferon-beta	1		regulation of transport	0.0624		response to other organisms	2.18e-09
positive regulation of response to wounding	0.738		cellular response to interferon-beta	0.000289		response to redox state	1					regulation of cellular localization	0.16		multi-organism process	1.37e-09
positive regulation of phosphatase activity	0.58		response to cytokine	0.000363		ribosome biogenesis	1					Golgi organization	0.123		cellular response to cytokine stimulus	1.19e-09
regulation of biological processes	0.719		response to other organism	0.000791		positive regulation of interleukin-6 production	1					cellular component assembly	0.168		cellular response to interferon-beta	2.49e-09
regulation of cellular process	0.784		cellular response to cytokine stimulus	0.000701								regulation of localization	0.173		response to interferon-beta	4.77e-09

## Sheet: C - Apoptosis
Gamma_WT\M			Gamma_WM\T			Theta_WT\M			Theta_WM\T			Omega_WT\M			Omega_WM\T
GO Term	FDR		GO Term	FDR		GO Term	FDR		GO Term	FDR		GO Term	FDR		GO Term	FDR
protein dephosphorylation	0.333		cellular response to cytokine stimulus	0.0061		translation	1.59e-07		defense response to other organism	0.00017		modification-dependent macromolecule catabolic process	0.0875		multi-organism process	4.79e-12
dephosphorylation	0.716		response to protozoan	0.00308		ribonucleoprotein complex biogenesis	1.08e-05		multi-organism process	0.00027		ubiquitin-dependent protein catabolic process	0.0576		response to other organism	2.45e-10
ubiquitin-dependent protein catabolic process	1		cellular response to interferon-beta	0.00438		cellular component biogenesis	5.95e-05		response to other organism	0.000199		modification-dependent protein catabolic process	0.0737		cellular respose to interferon-beta	1.96e-09
proteolysis	0.903		cellular response to interferon-gamma	0.0115		ribosome biogenesis	0.00169		response to interferon-beta	0.00184		proteolysis involved in cellular protein catabolic process	0.233		response to interferon-beta	3.4e-09
positive regulation of platelet activation	0.845		response to cytokine	0.0198		ncRNA processing	0.0255		defense response	0.00169		macromolecule catabolic process	0.547		defense response to other organism	4.46e-09

## Sheet: D - Jak-Stat
Gamma_WT\M			Gamma_WM\T			Theta_WT\M			Theta_WM\T			Theta_WT\M			Theta_WM\T
GO Term	FDR		GO Term	FDR		GO Term	FDR		GO Term	FDR		GO Term	FDR		GO Term	FDR
positive regulation of cell cycle	0.248		cellular response to interferon-beta	3.48e-05		tRNA wobble uridine modification	1		antigen processing and presentation of endogenous antigen	0.0745		regulation of cellular process	0.605		multi-organism process	5.76e-11
regulation of biological process	0.519		response to interferon-beta	0.000137		tRNA wobble base modification	1		antigen processing and presentation of endogenous antigen	0.142		regulation of biological process	0.461		response to other organisms	4.93e-11
regulation of metabolic process	0.557		response to cytokine	0.00633		tRNA thio-modification	1		antigen processing and presentation of peptide antigen via MHC class I	0.101		biological regulation	0.782		defense response to other organism	7.8e-10
regulation of cellular component organization	0.419		multi-organism process	0.00581					antigen processing and presentation of endogenous peptide antigen	0.255		cellular macromolecule metabolic process	0.675		cellular response to interferon-beta	9.56e-09
NIK/NF-kappaB signaling	0.348		defense reseponse to other ortanism	0.011					positive regulation of leukocyte activation	0.246		negative regulation of cellular process	0.882		response to external biotic stimulus	1.48e-08
